# Supplementary material for: Associations of observer’s gender, Body Mass Index and internalization of societal beauty ideals to visual body processing
Source: Psychol Res. 2021 Jan 12;85(8):3026–39. doi: 10.1007/s00426-020-01471-5 (PMC8476362; doi:10.1007/s00426-020-01471-5)
Supplement: Supplementary file 1 — Supplementary file1 (XLSX 32 KB) [file 426_2020_1471_MOESM1_ESM.xlsx]

## Sheet: DataSet_Body_Face
Subject	Age	Gender	weight	height	BMI	Handed_Score	EAT_Diet	EAT_Bulimia	EAT_OralContr	EAT_TotScore	SATAQ_IntThin	SATAQ_IntMusc	SATAQ_Family	SATAQ_Peers	SATAQ_Media	SATAQ_Press_Tot	Acc_Body_Inverted_F	Acc_Body_Upright_F	Acc_Face_Inverted_F	Acc_Face_Upright_F	Acc_Body_Inverted_M	Acc_Body_Upright_M	Acc_Face_Inverted_M	Acc_Face_Upright_M	RTs_Body_Inverted_F	RTs_Body_Upright_F	RTs_Face_Inverted_F	RTs_Face_Upright_F	RTs_Body_Inverted_M	RTs_Body_Upright_M	RTs_Face_Inverted_M	RTs_Face_Upright_M	IE_Body_Inverted_F	IE_Body_Upright_F	IE_Face_Inverted_F	IE_Face_Upright_F	IE_Body_Inverted_M	IE_Body_Upright_M	IE_Face_Inverted_M	IE_Face_Upright_M	IEs_BIE_F	IEs_FIE_F	IEs_BIE_M	IEs_FIE_M
1	27	female	56.8	1.615	21.7773	85.7143	1	0	4	5	2.6	2.8	1	1.5	2.75	5.25	1	1	0.97	1	0.97	1	0.94	0.97	927.03	718.22	919.42	796.28	773.81	734.44	1114.03	1008.65	927.03	718.22	947.856	796.28	797.742	734.44	1185.14	1039.85	208.81	151.576	63.3023	145.293
2	20	female	67.4	1.565	27.5189	68.4211	0	0	0	0	2.8	1.8	1.5	2	3.25	6.75	1	1	0.94	0.91	0.94	0.94	0.78	0.88	505.63	497.91	651.33	623	637.77	582.73	743.4	722.89	505.63	497.91	692.904	684.615	678.479	619.926	953.077	821.466	7.72	8.28887	58.5532	131.611
3	19	female	82.4	1.665	29.7234	100	3	0	0	3	3.6	1.8	4	1.25	2.25	7.5	0.785	0.66	0.94	1	0.875	0.94	0.905	0.97	1100	901	885.37	670.53	770.18	760.9	756.03	690.29	1401.27	1365.15	941.883	670.53	880.206	809.468	835.392	711.639	36.1224	271.353	70.7376	123.753
4	20	female	59.5	1.63	31.0136	100	3	0	2	5	4	2.8	1.25	3	4.5	8.75	0.81	0.88	0.88	0.97	0.815	0.94	0.815	1	941.5	787.75	810.21	708.26	1042.77	881.03	986.54	887.47	1162.35	895.17	920.693	730.165	1279.47	937.266	1210.48	887.47	267.175	190.528	342.206	323.009
5	22	female	99.6	1.7	34.4637	100	4	0	2	6	3.8	2.6	3.75	3.5	4	11.25	0.91	0.91	0.94	0.94	0.97	0.97	0.72	0.94	787.21	654.66	812.53	776.3	633.61	584.97	892.17	707.07	865.066	719.407	864.394	825.851	653.206	603.062	1239.12	752.202	145.659	38.5426	50.1443	486.923
6	25	female	50.3	1.645	18.5882	100	15	2	1	18	3.6	4.2	1.5	2	4	7.5	1	0.97	0.94	1	1	0.97	0.97	1	740.94	626.03	580.03	513.66	929.25	805.94	738.65	642.34	740.94	645.392	617.053	513.66	929.25	830.866	761.495	642.34	95.5482	103.393	98.384	119.155
7	29	female	65.5	1.69	22.9334	91.6	2	0	2	4	1.4	1	3	1	4	8	0.97	0.97	0.845	1	1	0.97	0.815	0.94	562.32	524.68	629.44	629.75	539.94	507.55	680.19	640.83	579.711	540.907	744.899	629.75	539.94	523.247	834.589	681.734	38.8041	115.149	16.6926	152.855
8	30	female	62.8	1.625	23.7822	100	3	0	2	5	2.6	2	1	1	4.25	6.25	0.845	0.97	0.94	0.905	0.88	0.91	0.75	0.72	948.22	952.61	1310.33	1314	1088.89	1126.59	1439.33	1315.04	1122.15	982.072	1393.97	1451.93	1237.38	1238.01	1919.11	1826.44	140.082	-57.9656	-0.635989	92.6622
9	31	female	64	1.62	24.3865	58.3	1	0	1	2	2	2.2	2	1	1.5	4.5	1	1	0.97	0.97	0.97	0.97	0.91	1	848.63	711.81	489.32	526.42	691.35	674.9	676.72	674.44	848.63	711.81	504.454	542.701	712.732	695.773	743.648	674.44	136.82	-38.2474	16.9588	69.2084
10	25	female	81.5	1.695	28.3673	100	11	0	3	14	2.8	2	1.25	1	1.75	4	0.69	0.78	0.905	1	0.875	0.97	0.815	0.845	1093.86	948.6	755.17	654.63	896.57	794.26	1046.38	865.52	1585.3	1216.15	834.442	654.63	1024.65	818.825	1283.9	1024.28	369.151	179.812	205.827	259.618
11	28	female	67.1	1.595	26.3755	100	20	5	3	28	3.8	1.8	5	4.25	5	14.25	0.845	0.97	0.97	1	0.97	1	0.91	0.97	831.81	573.26	853.84	597.19	528.77	494.88	1269.93	835.26	984.391	590.99	880.247	597.19	545.124	494.88	1395.53	861.093	393.401	283.057	50.2437	534.435
12	27	female	59	1.68	20.9042	-63.6364	13	0	5	18	3.6	2.2	1.25	2.75	5	9	0.845	0.905	0.905	1	1	0.97	0.88	0.97	926.63	791.86	733.21	699.69	836.91	740.32	899.04	749.39	1096.6	874.983	810.177	699.69	836.91	763.216	1021.64	772.567	221.62	110.487	73.6935	249.069
13	30	female	70	1.74	23.1206	-66.66	5	0	1	6	3.6	2.2	1.5	1	4	6.5	0.845	1	0.905	1	0.97	1	0.97	1	821.74	801.41	646.07	683.94	774	653.13	709.42	711	972.473	801.41	713.89	683.94	797.938	653.13	731.361	711	171.063	29.9495	144.808	20.3608
14	22	female	100.2	1.7	34.6713	83.33	0	0	2	2	2	1.6	3	2	4	9	0.72	0.845	0.845	0.81	0.66	0.845	0.88	0.97	626.78	616.59	661.15	673.15	589.95	567.07	674.86	632.61	870.528	729.692	782.426	831.049	893.864	671.089	766.886	652.175	140.835	-48.6233	222.775	114.711
15	36	female	94.7	1.69	33.1571	83.33	19	10	0	29	2.2	1	5	2	5	12	0.785	0.875	0.91	0.875	0.94	0.97	0.91	0.875	824.2	681.25	623.21	581.96	655.5	613.16	733	679.29	1049.94	778.571	684.846	665.097	697.34	632.124	805.495	776.331	271.365	19.749	65.2167	29.1631
16	19	female	55	1.58	22.0317	100	0	0	3	3	2.6	3	1	1	1.25	3.25	0.875	0.91	1	0.97	0.97	0.91	0.91	1	1419.18	1184.69	677.88	775.97	1192.61	1070.52	1164.79	986.47	1621.92	1301.86	677.88	799.969	1229.49	1176.4	1279.99	986.47	320.063	-122.089	53.0992	293.519
17	19	female	59.8	1.58	23.9545	69.23	14	3	0	17	4	1.8	5	3	5	13	0.88	0.94	1	1	1	0.94	0.785	0.91	981.71	1038.83	624.19	647.25	961.97	785.73	931.96	945.28	1115.58	1105.14	624.19	647.25	961.97	835.883	1187.21	1038.77	10.4412	-23.06	126.087	148.441
18	31	female	72.9	1.79	22.7521	44.44	0	1	1	2	2.2	1.2	1	1	2	4	1	1	0.97	1	0.94	0.845	0.875	1	660.44	645.16	548.29	563.06	670.2	614.3	663.82	672.31	660.44	645.16	565.247	563.06	712.979	726.982	758.651	672.31	15.28	2.18742	-14.0035	86.3414
19	19	female	65	1.68	23.03	-16.66	1	1	0	2	1.2	1.2	1.75	2.25	5	9	0.88	1	1	1	0.845	0.94	0.88	0.75	771.29	667.16	564.88	540.53	735.7	616.73	706.5	690.67	876.466	667.16	564.88	540.53	870.651	656.096	802.841	920.893	209.306	24.35	214.555	-118.052
20	18	female	51.8	1.6	20.2344	86.66	9	0	4	13	4	4.2	1	1.75	3.5	6.25	1	0.94	1	1	1	1	0.81	0.97	772.94	737.27	663.91	684.53	681.66	644.06	943.65	946.39	772.94	784.33	663.91	684.53	681.66	644.06	1165	975.66	-11.3898	-20.62	37.6	189.34
21	33	female	55	1.72	18.5911	82.6	1	0	2	3	2.6	1.2	1	1	3	5	0.75	0.94	0.875	0.97	0.97	0.97	0.78	0.94	875.25	798.83	723.21	656.42	690.03	685.68	838.4	746.07	1167	849.819	826.526	676.722	711.371	706.887	1074.87	793.691	317.181	149.804	4.48454	281.18
22	18	female	52	1.74	17.1753	100	0	0	0	0	2.4	1.6	1.75	1	3	5.75	0.845	0.97	0.94	0.91	0.88	0.97	0.88	0.91	637.04	610.1	557.03	528.72	627.93	575	673.43	628.48	753.893	628.969	592.585	581.011	713.557	592.784	765.261	690.637	124.924	11.5741	120.773	74.624
23	28	female	70.4	1.63	26.497	100	5	3	1	9	1.8	1.6	1.5	2	4.25	7.75	0.845	1	0.97	0.905	0.94	1	0.78	0.94	825.56	588.59	636.94	543.76	916.57	742.13	740.16	710.2	976.994	588.59	656.639	600.84	975.074	742.13	948.923	755.532	388.404	55.7994	232.944	193.391
24	43	female	47.8	1.55	19.8959	100	18	18	8	44	4	1.4	1	1	2	4	0.94	0.94	0.94	0.97	0.905	0.97	0.845	0.94	806.23	784.6	548.07	549.65	831.79	800.58	802	686.77	857.691	834.681	583.053	566.649	919.105	825.34	949.112	730.606	23.0106	16.4037	93.7648	218.506
101	20	male	67.5	1.719	22.8429	-16.6667	0	0	1	1	2.4	2.8	3	3.25	2	8.25	0.94	1	0.94	0.845	0.75	0.94	0.815	0.88	701.9	645.09	545.83	548.26	869.13	727.73	628.88	601.04	746.702	645.09	580.67	648.828	1158.84	774.181	771.632	683	101.612	-68.1582	384.659	88.6319
102	33	male	90	1.8	27.7778	81.8182	2	0	1	3	3	3	3.5	2.25	3	8.75	0.625	0.72	0.75	0.815	0.625	0.94	0.655	0.91	1019.15	934.48	1176.13	835.81	1334	855.3	1372.9	903.69	1630.64	1297.89	1568.17	1025.53	2134.4	909.894	2096.03	993.066	332.751	542.64	1224.51	1102.96
103	19	male	75.1	1.895	20.9132	-58.3333	0	0	0	0	2.8	2.8	1.5	2	1	4.5	0.97	1	1	1	0.97	0.97	0.94	1	804.74	839.75	674.34	647.22	811.77	647.87	1120.73	750.41	829.629	839.75	674.34	647.22	836.876	667.907	1192.27	750.41	-10.1211	27.12	168.969	441.856
104	34	male	88.4	1.706	30.3735	26.3158	16	4	5	25	4	5	1	1	1	3	0.97	1	0.97	0.97	0.78	1	0.815	0.97	1363.32	1219.38	1425.42	1102.55	1945.76	1363.78	1372.12	1412.58	1405.48	1219.38	1469.51	1136.65	2494.56	1363.78	1683.58	1456.27	186.105	332.856	1130.78	227.315
105	20	male	70.1	1.918	19.0555	50	0	1	2	3	2.2	2.2	2.25	2.25	2	6.5	0.81	0.97	0.845	0.91	0.88	0.97	0.78	0.91	1139.69	957.71	1248.19	942.52	865.96	831.68	1284.84	1091.24	1407.02	987.33	1477.15	1035.74	984.045	857.402	1647.23	1199.16	419.695	441.412	126.643	448.066
106	24	male	84	1.754	27.3036	83.3333	4	0	0	4	2	2.6	1.25	2	5	8.25	0.91	0.94	1	0.97	0.97	0.97	0.875	0.97	951.76	762.57	842.5	725.19	828.42	765.19	1151.89	857.42	1045.89	811.245	842.5	747.619	854.041	788.856	1316.45	883.938	234.645	94.8814	65.1856	432.508
107	20	male	79	1.77	25.2163	-26.3158	3	0	1	4	2.2	3.8	4	2.25	3.25	9.5	0.625	0.875	0.91	0.91	0.69	0.845	0.75	0.91	524.1	600.86	511.66	441.03	611.36	567.48	679.21	682.86	838.56	686.697	562.264	484.648	886.029	671.574	905.613	750.396	151.863	77.6154	214.455	155.218
108	35	male	78	1.7	26.9896	70	5	0	0	5	2.2	2.2	3	1	2.25	6.25	0.755	0.94	1	0.97	1	0.97	0.69	0.97	526.96	530.2	504.16	490	517.28	508.29	533.73	536.55	697.96	564.043	504.16	505.155	517.28	524.01	773.522	553.144	133.918	-0.994639	-6.73031	220.377
109	28	male	80	1.78	25.2493	100	16	6	0	22	4.4	2.2	1	1	3.5	5.5	0.845	1	1	1	1	1	0.815	1	743.74	691.97	617.53	511.91	621.78	576.53	1070.62	843.91	880.166	691.97	617.53	511.91	621.78	576.53	1313.64	843.91	188.196	105.62	45.25	469.734
110	19	male	77.2	1.87	22.0767	100	0	0	0	0	2.4	2.2	1.25	1.5	1.5	4.25	0.94	0.94	0.88	0.905	0.845	0.94	0.88	0.905	1610.5	1085.1	740.46	671.07	1173.19	1088.03	902.79	776.86	1713.3	1154.36	841.432	741.514	1388.39	1157.48	1025.9	858.409	558.936	99.918	230.912	167.489
111	19	male	80.4	1.885	22.6273	33.3333	1	0	1	2	4	3.6	2.25	1	5	8.25	0.91	0.97	0.94	0.97	0.97	1	0.91	1	830.97	715.74	613.17	675.87	678.23	658.88	746.93	691.25	913.154	737.876	652.309	696.773	699.206	658.88	820.802	691.25	175.278	-44.4647	40.3262	129.552
112	26	male	70.3	1.765	22.5666	86.6667	0	0	0	0	2.6	2.4	1	1	1.5	3.5	0.75	0.97	0.94	0.97	0.94	0.815	0.94	0.81	693.08	701.29	483.9	433.42	709.77	774.73	567.13	545.23	924.107	722.979	514.787	446.825	755.074	950.589	603.33	673.123	201.127	67.9625	-195.514	-69.7937
113	25	male	90.2	1.85	26.35	100	5	0	1	6	2.4	2.4	2.5	1	1	4.5	0.845	0.845	0.875	0.94	0.91	0.94	0.81	0.875	1031.74	862.96	901.64	760.23	923.69	753.57	1036.88	877.11	1220.99	1021.25	1030.45	808.755	1015.04	801.67	1280.1	1002.41	199.74	221.69	213.374	277.687
114	34	male	84	1.78	26.51	41.66	0	0	2	2	2.4	2.4	2.5	2	2.75	7.25	0.97	1	0.97	1	1	1	0.91	0.91	800.9	748.13	846.58	755.28	791.28	727.56	912.34	995.9	825.67	748.13	872.763	755.28	791.28	727.56	1002.57	1094.4	77.5401	117.483	63.72	-91.8242
115	20	male	73.9	1.77	23.58	91.66	19	10	0	29	2.4	2.4	2	1.5	4.75	8.25	0.94	1	0.94	0.97	1	1	0.875	0.94	755.73	655.38	874.27	845.39	637.72	571.22	953.18	780.37	803.968	655.38	930.074	871.536	637.72	571.22	1089.35	830.181	148.588	58.5384	66.5	259.168
116	24	male	70.6	1.76	22.79	76.47	0	0	3	3	3	3	1.25	3.25	2.25	6.75	0.97	1	0.94	1	0.94	0.97	0.845	0.91	635.35	540.69	643.83	644.72	614.2	557.97	816.07	754.28	655	540.69	684.926	644.72	653.404	575.227	965.763	828.879	114.31	40.2055	78.1775	136.884
117	18	male	73.7	1.83	22	66.66	14	3	0	17	2.6	2.6	2.5	3	2.75	8.25	0.905	0.97	1	1	1	1	0.75	0.94	740.07	567.77	497.59	493.34	573.94	554.91	608.83	583.67	817.757	585.33	497.59	493.34	573.94	554.91	811.773	620.926	232.427	4.25	19.03	190.848
118	18	male	56.4	1.64	20.96	73.33	0	1	1	2	2.6	2.6	1	1.25	1.5	3.75	0.845	0.845	0.94	0.94	1	0.97	0.91	0.91	665.11	663.78	586.97	602.93	606.63	556.65	684.38	626.97	787.112	785.538	624.436	641.415	606.63	573.866	752.066	688.978	1.57396	-16.9787	32.764	63.0879
119	20	male	67.8	1.82	20.46	36.84	1	1	0	2	1.8	1.8	1	1	1	3	0.97	1	0.97	1	1	1	0.97	1	798.35	564.69	548.9	564.25	615.63	564.63	689.42	524.13	823.041	564.69	565.876	564.25	615.63	564.63	710.742	524.13	258.351	1.62629	51	186.612
120	21	male	85.2	1.7	26.89	55.55	9	0	4	13	3.8	3.8	1	3.5	3	7.5	0.88	0.875	0.815	0.97	0.97	0.97	0.845	0.845	538.39	543.25	567.81	636.74	576.97	539.06	735.74	702.96	611.807	620.857	696.699	656.433	594.814	555.732	870.698	831.905	-9.05032	40.2664	39.0825	38.7929
121	30	male	73.9	1.71	25.72	47.82	1	0	2	3	1.6	1.6	1	1	1	3	0.81	0.815	0.81	1	1	1	0.72	0.845	618.92	556.65	466.58	478.94	564.88	507.69	564.48	628.85	764.099	683.006	576.025	478.94	564.88	507.69	784	744.201	81.0926	97.0847	57.19	39.7988
122	20	male	72	1.74	23.78	-75	0	0	0	0	3	3	2	2	2.5	6.5	0.5	0.5	0.91	0.94	0.5	0.5	1	0.94	1343.38	1265.19	750.1	739	1173.13	1322.75	920.09	840.07	2686.76	2530.38	824.286	786.17	2346.26	2645.5	920.09	893.691	156.38	38.1155	-299.24	26.3985
123	18	male	71.3	1.73	23.82	82.6	5	3	1	9	3.2	3.2	1	1	2.75	4.75	0.875	0.91	1	0.97	0.97	1	0.845	0.97	701.68	537.28	530.47	488.9	514.74	522.16	722.41	683.61	801.92	590.418	530.47	504.021	530.66	522.16	854.923	704.753	211.502	26.4494	8.49979	150.17
124	32	male	66.7	1.69	23.35	100	18	18	8	44	2.4	2.4	2.5	1	1	4.5	1	1	0.91	1	0.94	0.91	0.94	1	653.41	663.13	569.28	555.13	712.57	702.45	687.4	689.75	653.41	663.13	625.582	555.13	758.053	771.923	731.277	689.75	-9.72	70.4524	-13.8699	41.5266

## Sheet: DataSet_Object
Subject	Gender	Object_Inverted_Acc	Object_Upright_Acc	OIE_Acc	Object_Inverted_RTs	Object_Upright_RTs	OIE_RTs	IEs_Inverted	IEs_Upright	IEs_OIE
1	female	0.94	0.89	0.05	1213.13	1107.53	105.6	1290.56	1244.42	46.1481
2	female	0.895	0.925	-0.03	789.46	750.97	38.49	882.078	811.859	70.2188
3	female	0.925	0.91	0.015	1132.83	1238.36	-105.53	1224.68	1360.84	-136.154
4	female	0.595	0.78	-0.185	1276.89	962.2	314.69	2146.03	1233.59	912.444
5	female	0.81	0.925	-0.115	948.88	994.44	-45.56	1171.46	1075.07	96.3865
6	female	0.735	0.86	-0.125	1424.83	1268.84	155.99	1938.54	1475.4	463.149
7	female	0.845	0.875	-0.03	938.31	877.79	60.52	1110.43	1003.19	107.237
8	female	0.845	0.845	0	1769.24	1646.56	122.68	2093.78	1948.59	145.183
9	female	0.985	0.97	0.015	1098.71	1080.61	18.1	1115.44	1114.03	1.4107
10	female	0.845	0.91	-0.065	1055.44	952.97	102.47	1249.04	1047.22	201.822
11	female	0.795	0.735	0.06	1350.75	1234.19	116.56	1699.06	1679.17	19.8865
12	female	0.94	0.94	0	1096.03	1026.2	69.83	1165.99	1091.7	74.2872
13	female	0.56	0.575	-0.015	994.36	981.92	12.44	1775.64	1707.69	67.9559
14	female	0.83	0.86	-0.03	631.09	623.33	7.76	760.349	724.802	35.5471
15	female	0.94	0.97	-0.03	840.83	760.08	80.75	894.5	783.588	110.912
16	female	0.705	0.545	0.16	1496.64	1754.29	-257.65	2122.89	3218.88	-1095.99
17	female	0.83	0.765	0.065	1268.11	1562.12	-294.01	1527.84	2041.99	-514.144
18	female	0.905	0.97	-0.065	876.26	830.21	46.05	968.243	855.887	112.356
19	female	0.5	0.5	0	701.78	646.5	55.28	1403.56	1293	110.56
20	female	0.86	0.97	-0.11	1139.62	945.87	193.75	1325.14	975.124	350.016
21	female	0.825	0.955	-0.13	1113.21	992.89	120.32	1349.35	1039.68	309.67
22	female	0.825	0.925	-0.1	931.43	808.92	122.51	1129.01	874.508	254.498
23	female	0.89	0.925	-0.035	1298.16	1229.03	69.13	1458.61	1328.68	129.926
24	female	0.89	0.845	0.045	1035.07	898.22	136.85	1163	1062.98	100.018
101	male	0.595	0.61	-0.015	628.95	651.05	-22.1	1057.06	1067.3	-10.2363
102	male	0.81	0.875	-0.065	1226.58	1172.13	54.45	1514.3	1339.58	174.719
103	male	0.925	1	-0.075	1849.92	1372.67	477.25	1999.91	1372.67	627.244
104	male	0.88	0.94	-0.06	1764.29	1477.15	287.14	2004.88	1571.44	433.439
105	male	0.925	0.925	0	1322.42	875.95	446.47	1429.64	946.973	482.67
106	male	0.78	0.81	-0.03	1260.54	1146.67	113.87	1616.08	1415.64	200.435
107	male	0.94	0.815	0.125	766.77	732.56	34.21	815.713	898.847	-83.1339
108	male	0.7	0.825	-0.125	970.24	908.55	61.69	1386.06	1101.27	284.784
109	male	0.955	1	-0.045	1113.38	880.25	233.13	1165.84	880.25	285.593
110	male	0.845	0.94	-0.095	1305.44	1179.57	125.87	1544.9	1254.86	290.038
111	male	0.895	0.81	0.085	1418.68	1252.75	165.93	1585.12	1546.6	38.5124
112	male	0.845	0.89	-0.045	986.93	793.82	193.11	1167.96	891.933	276.032
113	male	0.94	0.94	0	1131.53	999.3	132.23	1203.76	1063.09	140.67
114	male	0.955	0.955	0	1036.49	970.13	66.36	1085.33	1015.84	69.4869
115	male	0.91	0.97	-0.06	1306.72	1503.02	-196.3	1435.96	1549.51	-113.549
116	male	0.91	0.985	-0.075	1370.1	1074.95	295.15	1505.6	1091.32	414.285
117	male	0.94	0.955	-0.015	1123.72	944.79	178.93	1195.45	989.309	206.138
118	male	0.91	0.955	-0.045	944	835.54	108.46	1037.36	874.911	162.452
119	male	0.905	0.905	0	578.64	687.48	-108.84	639.381	759.646	-120.265
120	male	0.925	0.875	0.05	810.54	804.66	5.88	876.259	919.611	-43.352
121	male	0.565	0.785	-0.22	896.75	834.12	62.63	1587.17	1062.57	524.595
122	male	0.925	0.97	-0.045	1283.03	935.77	347.26	1387.06	964.711	422.348
123	male	0.83	0.94	-0.11	885.02	855.23	29.79	1066.29	909.819	156.47
124	male	0.925	0.94	-0.015	1353.46	1218.02	135.44	1463.2	1295.77	167.434
